# Supplementary material
Source: publisher figshare collection journal article supplement (https://acs.figshare.com/ndownloader/files/8987530)
Supplement: Supplementary file 1 [file 8987530]

 
data_jw1736 
 
_audit_creation_method            SHELXL-97 
_chemical_name_systematic 
; 
 ? 
; 
_chemical_name_common             ? 
_chemical_melting_point           ? 
_chemical_formula_moiety          'C56 H42 N20'
_chemical_formula_sum             'C28 H21 N10' 
_chemical_formula_weight          497.55 
_chemical_compound_source         'Synthesized by the authors. See text'

loop_ 
 _atom_type_symbol 
 _atom_type_description 
 _atom_type_scat_dispersion_real 
 _atom_type_scat_dispersion_imag 
 _atom_type_scat_source 
 'C'  'C'   0.0181   0.0091 
 'International Tables Vol C Tables 4.2.6.8 and 6.1.1.4' 
 'H'  'H'   0.0000   0.0000 
 'International Tables Vol C Tables 4.2.6.8 and 6.1.1.4' 
 'N'  'N'   0.0311   0.0180 
 'International Tables Vol C Tables 4.2.6.8 and 6.1.1.4' 
 
_symmetry_cell_setting            Triclinic
_symmetry_space_group_name_H-M    P-1
_symmetry_space_group_name_hall   '-P 1'
 
loop_ 
 _symmetry_equiv_pos_as_xyz 
 'x, y, z' 
 '-x, -y, -z' 
 
_cell_length_a                    11.9255(4)
_cell_length_b                    11.9827(4)
_cell_length_c                    19.5388(7)
_cell_angle_alpha                 80.272(2)
_cell_angle_beta                  77.044(2)
_cell_angle_gamma                 85.171(2)
_cell_volume                      2678.77(16) 
_cell_formula_units_Z             2 
_cell_measurement_temperature     100
_cell_measurement_reflns_used     20199
_cell_measurement_theta_min        2.35
_cell_measurement_theta_max       70.58
 
_exptl_crystal_description        'BLOCK'
_exptl_crystal_colour             'Colorless'
_exptl_crystal_size_max           0.25
_exptl_crystal_size_mid           0.21
_exptl_crystal_size_min           0.18
_exptl_crystal_density_meas          ?
_exptl_crystal_density_diffrn     0.617 
_exptl_crystal_density_method     'not measured' 
_exptl_crystal_F_000              518 
_exptl_absorpt_coefficient_mu     0.318 
_exptl_absorpt_correction_Type    multi-scan
_exptl_absorpt_correction_T_min   0.7933
_exptl_absorpt_correction_T_max   0.9444
_exptl_absorpt_process_details    'Sadabs (Sheldrick, 2008)'
 
_exptl_special_details
;
X-ray crystallographic data for I were collected from a single crystal
sample, which was mounted on a loop fiber. Data were collected using
a Bruker smart diffractometer equiped with an APEX II CCD Detector,
a Incoatec IMuS source and a Quazar MX mirror. The crystal-to-detector distance 
5.0 cm, and the data collection was carried out in 512 x 512 pixel mode.
The initial unit cell parameters were determined by a least-squares fit
of the angular setting of strong reflections, collected by a 10.0 degree
scan in 33 frames over three different parts of the reciprocal space
(99 frames total). 


;
 
_diffrn_ambient_temperature       100
_diffrn_radiation_wavelength      1.54178 
_diffrn_radiation_type            CuK\a 
_diffrn_radiation_source          'Incoatec I\muS Microsource '
_diffrn_radiation_monochromator   'Quazar MX'
_diffrn_measurement_device_type   'Bruker APEX II'
_diffrn_measurement_method        '\w'
_diffrn_detector_area_resol_mean   8.3
_diffrn_reflns_number             69907
_diffrn_reflns_av_R_equivalents   0.044
_diffrn_reflns_av_sigmaI/netI     0.0437 
_diffrn_reflns_limit_h_min        -14
_diffrn_reflns_limit_h_max        14
_diffrn_reflns_limit_k_min        -14
_diffrn_reflns_limit_k_max        14
_diffrn_reflns_limit_l_min        -23
_diffrn_reflns_limit_l_max        23
_diffrn_reflns_theta_min          2.35 
_diffrn_reflns_theta_max          71.09 
_reflns_number_total              9996
_reflns_number_gt                 8230
_reflns_threshold_expression      'I>2\s(I)'
 
_computing_data_collection        'APEX2  (Bruker AXS, 2009)'
_computing_cell_refinement        'SAINT V7.68A(Bruker AXS, 2009)'
_computing_data_reduction         'SAINT V7.68A(Bruker AXS, 2009)'
_computing_structure_solution     'SHELXS97 (Sheldrick, 2008)'
_computing_structure_refinement   'SHELXL97 (Sheldrick, 2008)'
_computing_molecular_graphics     'SHELXTL  (Bruker AXS, 2003)'
_computing_publication_material   'UdMX (Maris, 2004)'
 
_refine_special_details 
; 
 Refinement of F^2^ against ALL reflections.  The weighted R-factor wR and 
 goodness of fit S are based on F^2^, conventional R-factors R are based 
 on F, with F set to zero for negative F^2^. The threshold expression of 
 F^2^ > 2sigma(F^2^) is used only for calculating R-factors(gt) etc. and is 
 not relevant to the choice of reflections for refinement.  R-factors based 
 on F^2^ are statistically about twice as large as those based on F, and R- 
 factors based on ALL data will be even larger. 
; 
 
_refine_ls_structure_factor_coef  Fsqd  
_refine_ls_matrix_type            full 
_refine_ls_weighting_scheme       calc  
_refine_ls_weighting_details
 'calc w=1/[\s^2^(Fo^2^)+(0.1626P)^2^+1.0153P] where P=(Fo^2^+2Fc^2^)/3' 
_atom_sites_solution_primary      direct 
_atom_sites_solution_secondary    difmap 
_atom_sites_solution_hydrogens    geom
_refine_ls_hydrogen_treatment     constr
_refine_ls_extinction_method      none 
_refine_ls_extinction_coef        ? 
_refine_ls_number_reflns          9996 
_refine_ls_number_parameters      343 
_refine_ls_number_restraints      0 
_refine_ls_R_factor_all           0.0957 
_refine_ls_R_factor_gt            0.0864 
_refine_ls_wR_factor_ref          0.2523 
_refine_ls_wR_factor_gt           0.2446 
_refine_ls_goodness_of_fit_ref    1.048 
_refine_ls_restrained_S_all       1.048 
_refine_ls_shift/su_max           0.000 
_refine_ls_shift/su_mean          0.000 

loop_
  _platon_squeeze_void_nr             
  _platon_squeeze_void_average_x      
  _platon_squeeze_void_average_y      
  _platon_squeeze_void_average_z      
  _platon_squeeze_void_volume         
  _platon_squeeze_void_count_electrons
         1     0.010    -0.074     0.468    1709.4     709.7

_platon_squeeze_details
;
Attempts to  model disordered solvent molecules
were unsuccessful. PLATON/SQUEEZE  was used to correct
the data for the presence of the disordered solvent.
A potential solvent volume of 1712.2 \%A^3^, 
63.9 % of the total unit-cell volume, was found.
710 electrons per unit cell worth of scattering were located
in the void. The reported structure is based on the 
PLATON/SQUEEZE corrected data. The actual solvent content is
unknown, so several quantities calculated like empirical formula, density, 
absorption coefficient, F(000) etc. may be incorrect.

Ref:  Sluis, P. van der & Spek, A.L. (1990). Acta Cryst. A46, 194-201.
;

 
loop_ 
 _atom_site_label 
 _atom_site_type_symbol 
 _atom_site_fract_x 
 _atom_site_fract_y 
 _atom_site_fract_z 
 _atom_site_U_iso_or_equiv 
 _atom_site_adp_type 
 _atom_site_occupancy 
 _atom_site_symmetry_multiplicity 
 _atom_site_calc_flag 
 _atom_site_refinement_flags 
 _atom_site_disorder_assembly 
 _atom_site_disorder_group 
C1 C 0.45935(14) 0.26798(13) 0.48960(9) 0.0191(4) Uani 1 1 d . . . 
C2 C 0.42173(15) 0.19974(13) 0.56438(10) 0.0216(4) Uani 1 1 d . . . 
C3 C 0.30525(16) 0.20054(14) 0.59820(10) 0.0258(4) Uani 1 1 d . . . 
H3 H 0.2495 0.2381 0.5733 0.031 Uiso 1 1 calc R . . 
C4 C 0.27000(17) 0.14686(16) 0.66805(11) 0.0299(4) Uani 1 1 d . . . 
H4 H 0.1905 0.1476 0.6903 0.036 Uiso 1 1 calc R . . 
C5 C 0.35066(18) 0.09240(17) 0.70501(11) 0.0313(4) Uani 1 1 d . . . 
C6 C 0.46699(18) 0.09037(16) 0.67162(11) 0.0308(4) Uani 1 1 d . . . 
H6 H 0.5226 0.0523 0.6965 0.037 Uiso 1 1 calc R . . 
C7 C 0.50163(17) 0.14400(15) 0.60210(10) 0.0270(4) Uani 1 1 d . . . 
H7 H 0.5811 0.1426 0.5799 0.032 Uiso 1 1 calc R . . 
C8 C 0.3147(2) 0.0382(2) 0.78061(12) 0.0384(5) Uani 1 1 d . . . 
C9 C 0.1835(2) -0.0535(2) 0.87058(12) 0.0484(6) Uani 1 1 d . . . 
C10 C 0.3541(2) -0.0121(3) 0.88992(13) 0.0548(7) Uani 1 1 d . . . 
C11 C 0.37897(14) 0.25412(14) 0.44079(10) 0.0218(4) Uani 1 1 d . . . 
C12 C 0.34854(17) 0.34334(15) 0.39221(11) 0.0271(4) Uani 1 1 d . . . 
H12 H 0.3738 0.4168 0.3912 0.033 Uiso 1 1 calc R . . 
C13 C 0.28156(17) 0.32739(16) 0.34477(11) 0.0304(4) Uani 1 1 d . . . 
H13 H 0.2615 0.3898 0.3121 0.036 Uiso 1 1 calc R . . 
C14 C 0.24427(16) 0.22057(17) 0.34530(10) 0.0282(4) Uani 1 1 d . . . 
C15 C 0.27504(15) 0.13027(15) 0.39359(10) 0.0267(4) Uani 1 1 d . . . 
H15 H 0.2499 0.0569 0.3943 0.032 Uiso 1 1 calc R . . 
C16 C 0.34172(16) 0.14564(14) 0.44059(10) 0.0256(4) Uani 1 1 d . . . 
H16 H 0.3624 0.0828 0.4728 0.031 Uiso 1 1 calc R . . 
C17 C 0.17043(16) 0.20355(18) 0.29649(10) 0.0297(4) Uani 1 1 d . . . 
C18 C 0.1041(2) 0.2603(2) 0.19636(13) 0.0495(6) Uani 1 1 d . . . 
C19 C 0.04254(16) 0.0994(2) 0.26803(11) 0.0336(5) Uani 1 1 d . . . 
C20 C 0.58333(14) 0.23711(13) 0.45398(9) 0.0202(4) Uani 1 1 d . . . 
C21 C 0.62874(17) 0.13486(15) 0.43196(11) 0.0285(4) Uani 1 1 d . . . 
H21 H 0.5805 0.0735 0.4370 0.034 Uiso 1 1 calc R . . 
C22 C 0.74595(19) 0.12419(18) 0.40247(13) 0.0384(5) Uani 1 1 d . . . 
H22 H 0.7781 0.0547 0.3876 0.046 Uiso 1 1 calc R . . 
C23 C 0.81684(17) 0.2147(2) 0.39448(13) 0.0404(5) Uani 1 1 d . . . 
H23 H 0.8968 0.2059 0.3747 0.048 Uiso 1 1 calc R . . 
N1 N 0.20959(18) -0.00407(18) 0.80139(10) 0.0428(5) Uani 1 1 d . . . 
C24 C 0.77110(16) 0.31826(17) 0.41534(11) 0.0306(4) Uani 1 1 d . . . 
H24 H 0.8188 0.3804 0.4090 0.037 Uiso 1 1 calc R . . 
N2 N 0.2522(2) -0.0583(2) 0.91719(11) 0.0532(6) Uani 1 1 d . . . 
C25 C 0.65407(14) 0.32780(14) 0.44557(9) 0.0202(4) Uani 1 1 d . . . 
N3 N 0.39109(19) 0.0357(2) 0.82138(11) 0.0486(5) Uani 1 1 d . . . 
N4 N 0.0836(2) -0.1051(3) 0.89392(12) 0.0666(8) Uani 1 1 d . . . 
H4A H 0.0655 -0.1401 0.9380 0.080 Uiso 1 1 calc R . . 
H4B H 0.0362 -0.1040 0.8652 0.080 Uiso 1 1 calc R . . 
N5 N 0.4256(2) -0.0148(3) 0.93434(13) 0.0799(10) Uani 1 1 d . . . 
H5A H 0.4046 -0.0460 0.9791 0.096 Uiso 1 1 calc R . . 
H5B H 0.4936 0.0146 0.9187 0.096 Uiso 1 1 calc R . . 
C26 C 0.58398(13) 0.42422(13) 0.47210(9) 0.0176(3) Uani 1 1 d . . . 
N6 N 0.1723(2) 0.28146(19) 0.23958(11) 0.0485(5) Uani 1 1 d . . . 
C27 C 0.46961(13) 0.39191(12) 0.49709(9) 0.0167(3) Uani 1 1 d . . . 
N7 N 0.03742(16) 0.17201(19) 0.20873(10) 0.0410(5) Uani 1 1 d . . . 
C28 C 0.61627(13) 0.53322(13) 0.47423(9) 0.0183(3) Uani 1 1 d . . . 
H28 H 0.6936 0.5549 0.4568 0.022 Uiso 1 1 calc R . . 
N8 N 0.11079(14) 0.10950(16) 0.31408(9) 0.0320(4) Uani 1 1 d . . . 
N9 N 0.1054(3) 0.3326(3) 0.13707(15) 0.0908(12) Uani 1 1 d . . . 
H9A H 0.0632 0.3215 0.1074 0.109 Uiso 1 1 calc R . . 
H9B H 0.1484 0.3918 0.1273 0.109 Uiso 1 1 calc R . . 
N10 N -0.02213(17) 0.0103(2) 0.28326(10) 0.0446(5) Uani 1 1 d . . . 
H10A H -0.0667 0.0003 0.2547 0.054 Uiso 1 1 calc R . . 
H10B H -0.0206 -0.0390 0.3220 0.054 Uiso 1 1 calc R . . 
 
loop_ 
 _atom_site_aniso_label 
 _atom_site_aniso_U_11 
 _atom_site_aniso_U_22 
 _atom_site_aniso_U_33 
 _atom_site_aniso_U_23 
 _atom_site_aniso_U_13 
 _atom_site_aniso_U_12 
C1 0.0215(8) 0.0120(7) 0.0277(9) -0.0053(6) -0.0106(7) -0.0034(6) 
C2 0.0276(8) 0.0125(7) 0.0290(9) -0.0051(6) -0.0113(7) -0.0072(6) 
C3 0.0278(9) 0.0201(8) 0.0319(10) -0.0041(7) -0.0091(7) -0.0069(6) 
C4 0.0329(9) 0.0282(9) 0.0322(10) -0.0070(8) -0.0080(8) -0.0144(7) 
C5 0.0407(11) 0.0316(9) 0.0251(10) -0.0027(8) -0.0105(8) -0.0168(8) 
C6 0.0343(10) 0.0295(9) 0.0326(10) -0.0004(8) -0.0158(8) -0.0092(7) 
C7 0.0320(9) 0.0215(8) 0.0316(10) -0.0044(7) -0.0137(8) -0.0052(7) 
C8 0.0450(12) 0.0479(12) 0.0266(11) 0.0004(9) -0.0118(9) -0.0281(10) 
C9 0.0545(14) 0.0734(16) 0.0237(11) -0.0038(10) -0.0109(9) -0.0396(13) 
C10 0.0573(15) 0.088(2) 0.0238(11) 0.0019(12) -0.0143(10) -0.0396(14) 
C11 0.0213(8) 0.0192(8) 0.0286(9) -0.0071(7) -0.0081(7) -0.0068(6) 
C12 0.0341(9) 0.0191(8) 0.0345(10) -0.0050(7) -0.0175(8) -0.0078(7) 
C13 0.0332(9) 0.0280(9) 0.0360(11) -0.0062(8) -0.0174(8) -0.0063(7) 
C14 0.0240(8) 0.0349(10) 0.0313(10) -0.0138(8) -0.0093(7) -0.0064(7) 
C15 0.0258(8) 0.0250(8) 0.0337(10) -0.0121(7) -0.0065(7) -0.0109(7) 
C16 0.0308(9) 0.0153(7) 0.0366(10) -0.0088(7) -0.0145(8) -0.0054(6) 
C17 0.0274(9) 0.0399(10) 0.0259(10) -0.0129(8) -0.0050(7) -0.0111(8) 
C18 0.0566(14) 0.0656(16) 0.0351(12) -0.0022(11) -0.0228(11) -0.0279(12) 
C19 0.0232(9) 0.0568(13) 0.0263(10) -0.0190(9) -0.0037(7) -0.0125(8) 
C20 0.0222(8) 0.0149(7) 0.0271(9) -0.0098(6) -0.0096(7) 0.0025(6) 
C21 0.0366(10) 0.0164(8) 0.0402(11) -0.0145(7) -0.0193(8) 0.0047(7) 
C22 0.0392(11) 0.0310(10) 0.0558(13) -0.0285(9) -0.0228(10) 0.0155(8) 
C23 0.0247(9) 0.0481(12) 0.0569(14) -0.0355(11) -0.0107(9) 0.0105(8) 
N1 0.0468(11) 0.0588(12) 0.0303(10) -0.0054(8) -0.0144(8) -0.0319(9) 
C24 0.0204(8) 0.0338(10) 0.0433(11) -0.0211(8) -0.0090(8) 0.0026(7) 
N2 0.0549(12) 0.0850(16) 0.0249(10) -0.0010(10) -0.0114(9) -0.0391(12) 
C25 0.0189(8) 0.0177(7) 0.0273(9) -0.0090(6) -0.0085(6) 0.0015(6) 
N3 0.0488(11) 0.0751(14) 0.0279(10) 0.0017(9) -0.0165(8) -0.0338(10) 
N4 0.0685(15) 0.111(2) 0.0287(11) 0.0024(12) -0.0154(10) -0.0637(15) 
N5 0.0709(16) 0.146(3) 0.0307(12) 0.0119(14) -0.0249(11) -0.0650(18) 
C26 0.0177(7) 0.0145(7) 0.0237(8) -0.0089(6) -0.0063(6) -0.0015(6) 
N6 0.0576(12) 0.0568(12) 0.0400(11) -0.0033(9) -0.0232(9) -0.0282(10) 
C27 0.0177(7) 0.0104(6) 0.0262(8) -0.0073(6) -0.0099(6) -0.0020(5) 
N7 0.0359(9) 0.0630(12) 0.0308(10) -0.0129(9) -0.0105(7) -0.0187(8) 
C28 0.0133(6) 0.0164(7) 0.0273(8) -0.0062(6) -0.0055(6) -0.0049(5) 
N8 0.0270(8) 0.0484(10) 0.0268(8) -0.0135(7) -0.0069(6) -0.0182(7) 
N9 0.132(3) 0.102(2) 0.0560(16) 0.0246(15) -0.0605(18) -0.073(2) 
N10 0.0402(10) 0.0690(13) 0.0329(10) -0.0114(9) -0.0126(8) -0.0285(9) 
 
_geom_special_details 
; 
 All esds (except the esd in the dihedral angle between two l.s. planes) 
 are estimated using the full covariance matrix.  The cell esds are taken 
 into account individually in the estimation of esds in distances, angles 
 and torsion angles; correlations between esds in cell parameters are only 
 used when they are defined by crystal symmetry.  An approximate (isotropic) 
 treatment of cell esds is used for estimating esds involving l.s. planes. 
; 
 


loop_                                         
        _geom_bond_atom_site_label_1          
        _geom_bond_atom_site_label_2          
        _geom_bond_site_symmetry_1            
        _geom_bond_site_symmetry_2            
        _geom_bond_distance                   
        _geom_bond_publ_flag                  
C1             C20            .              .                     1.530(2)   y
C1             C11            .              .                     1.532(2)   y
C1             C27            .              .                   1.5342(19)   y
C1             C2             .              .                     1.539(2)   y
C2             C7             .              .                     1.392(3)   y
C2             C3             .              .                     1.398(3)   y
C3             C4             .              .                     1.395(3)   y
C3             H3             .              .                       0.9500   ?
C4             C5             .              .                     1.385(3)   y
C4             H4             .              .                       0.9500   ?
C5             C6             .              .                     1.394(3)   y
C5             C8             .              .                     1.492(3)   y
C6             C7             .              .                     1.388(3)   y
C6             H6             .              .                       0.9500   ?
C7             H7             .              .                       0.9500   ?
C8             N3             .              .                     1.334(3)   y
C8             N1             .              .                     1.342(3)   y
C9             N4             .              .                     1.339(3)   y
C9             N2             .              .                     1.346(3)   y
C9             N1             .              .                     1.359(3)   y
C10            N2             .              .                     1.339(3)   y
C10            N5             .              .                     1.341(3)   y
C10            N3             .              .                     1.354(3)   y
C11            C12            .              .                     1.386(3)   y
C11            C16            .              .                     1.410(2)   y
C12            C13            .              .                     1.397(3)   y
C12            H12            .              .                       0.9500   ?
C13            C14            .              .                     1.388(3)   y
C13            H13            .              .                       0.9500   ?
C14            C15            .              .                     1.393(3)   y
C14            C17            .              .                     1.483(2)   y
C15            C16            .              .                     1.385(3)   y
C15            H15            .              .                       0.9500   ?
C16            H16            .              .                       0.9500   ?
C17            N6             .              .                     1.323(3)   y
C17            N8             .              .                     1.337(3)   y
C18            N9             .              .                     1.322(4)   y
C18            N7             .              .                     1.334(3)   y
C18            N6             .              .                     1.362(3)   y
C19            N10            .              .                     1.324(3)   y
C19            N7             .              .                     1.336(3)   y
C19            N8             .              .                     1.367(2)   y
C20            C21            .              .                     1.393(2)   y
C20            C25            .              .                     1.397(2)   y
C21            C22            .              .                     1.391(3)   y
C21            H21            .              .                       0.9500   ?
C22            C23            .              .                     1.398(3)   y
C22            H22            .              .                       0.9500   ?
C23            C24            .              .                     1.400(3)   y
C23            H23            .              .                       0.9500   ?
C24            C25            .              .                     1.391(2)   y
C24            H24            .              .                       0.9500   ?
C25            C26            .              .                     1.465(2)   y
N4             H4a            .              .                       0.8800   ?
N4             H4b            .              .                       0.8800   ?
N5             H5a            .              .                       0.8800   ?
N5             H5b            .              .                       0.8800   ?
C26            C28            .              .                     1.402(2)   y
C26            C27            .              .                     1.405(2)   y
C27            C28            .              2_666                 1.388(2)   y
C28            C27            .              2_666                 1.388(2)   y
C28            H28            .              .                       0.9500   ?
N9             H9a            .              .                       0.8800   ?
N9             H9b            .              .                       0.8800   ?
N10            H10a           .              .                       0.8800   ?
N10            H10b           .              .                       0.8800   ?

loop_                                         
        _geom_angle_atom_site_label_1         
        _geom_angle_atom_site_label_2         
        _geom_angle_atom_site_label_3         
        _geom_angle_site_symmetry_1           
        _geom_angle_site_symmetry_2           
        _geom_angle_site_symmetry_3           
        _geom_angle                           
        _geom_angle_publ_flag                 
C20       C1        C11       .         .         .         109.19(14)        y
C20       C1        C27       .         .         .         100.89(12)        y
C11       C1        C27       .         .         .         113.21(13)        y
C20       C1        C2        .         .         .         112.64(13)        y
C11       C1        C2        .         .         .         111.99(13)        y
C27       C1        C2        .         .         .         108.47(13)        y
C7        C2        C3        .         .         .         118.39(17)        y
C7        C2        C1        .         .         .         121.71(16)        y
C3        C2        C1        .         .         .         119.69(15)        y
C4        C3        C2        .         .         .         120.78(17)        y
C4        C3        H3        .         .         .              119.6        ?
C2        C3        H3        .         .         .              119.6        ?
C5        C4        C3        .         .         .         120.11(19)        y
C5        C4        H4        .         .         .              119.9        ?
C3        C4        H4        .         .         .              119.9        ?
C4        C5        C6        .         .         .         119.60(19)        y
C4        C5        C8        .         .         .           120.7(2)        y
C6        C5        C8        .         .         .         119.68(19)        y
C7        C6        C5        .         .         .         120.06(18)        y
C7        C6        H6        .         .         .              120.0        ?
C5        C6        H6        .         .         .              120.0        ?
C6        C7        C2        .         .         .         121.06(18)        y
C6        C7        H7        .         .         .              119.5        ?
C2        C7        H7        .         .         .              119.5        ?
N3        C8        N1        .         .         .           125.9(2)        y
N3        C8        C5        .         .         .         116.47(19)        y
N1        C8        C5        .         .         .         117.60(18)        y
N4        C9        N2        .         .         .           117.1(2)        y
N4        C9        N1        .         .         .           117.8(2)        y
N2        C9        N1        .         .         .           125.1(2)        y
N2        C10       N5        .         .         .           116.9(2)        y
N2        C10       N3        .         .         .           125.5(2)        y
N5        C10       N3        .         .         .           117.7(2)        y
C12       C11       C16       .         .         .         118.17(16)        y
C12       C11       C1        .         .         .         122.16(14)        y
C16       C11       C1        .         .         .         119.46(15)        y
C11       C12       C13       .         .         .         121.37(16)        y
C11       C12       H12       .         .         .              119.3        ?
C13       C12       H12       .         .         .              119.3        ?
C14       C13       C12       .         .         .         120.17(18)        y
C14       C13       H13       .         .         .              119.9        ?
C12       C13       H13       .         .         .              119.9        ?
C13       C14       C15       .         .         .         118.87(17)        y
C13       C14       C17       .         .         .         120.50(19)        y
C15       C14       C17       .         .         .         120.61(17)        y
C16       C15       C14       .         .         .         121.14(16)        y
C16       C15       H15       .         .         .              119.4        ?
C14       C15       H15       .         .         .              119.4        ?
C15       C16       C11       .         .         .         120.27(17)        y
C15       C16       H16       .         .         .              119.9        ?
C11       C16       H16       .         .         .              119.9        ?
N6        C17       N8        .         .         .         126.93(18)        y
N6        C17       C14       .         .         .         116.77(18)        y
N8        C17       C14       .         .         .         116.28(18)        y
N9        C18       N7        .         .         .           117.7(2)        y
N9        C18       N6        .         .         .           117.1(2)        y
N7        C18       N6        .         .         .           125.2(2)        y
N10       C19       N7        .         .         .         117.94(18)        y
N10       C19       N8        .         .         .           117.2(2)        y
N7        C19       N8        .         .         .         124.85(19)        y
C21       C20       C25       .         .         .         120.49(16)        y
C21       C20       C1        .         .         .         128.53(16)        y
C25       C20       C1        .         .         .         110.97(13)        y
C22       C21       C20       .         .         .         118.84(17)        y
C22       C21       H21       .         .         .              120.6        ?
C20       C21       H21       .         .         .              120.6        ?
C21       C22       C23       .         .         .         120.64(16)        y
C21       C22       H22       .         .         .              119.7        ?
C23       C22       H22       .         .         .              119.7        ?
C22       C23       C24       .         .         .         120.66(18)        y
C22       C23       H23       .         .         .              119.7        ?
C24       C23       H23       .         .         .              119.7        ?
C8        N1        C9        .         .         .         114.28(19)        y
C25       C24       C23       .         .         .         118.34(18)        y
C25       C24       H24       .         .         .              120.8        ?
C23       C24       H24       .         .         .              120.8        ?
C10       N2        C9        .         .         .           114.6(2)        y
C24       C25       C20       .         .         .         121.01(15)        y
C24       C25       C26       .         .         .         130.10(15)        y
C20       C25       C26       .         .         .         108.89(14)        y
C8        N3        C10       .         .         .           114.5(2)        y
C9        N4        H4A       .         .         .              120.0        ?
C9        N4        H4B       .         .         .              120.0        ?
H4A       N4        H4B       .         .         .              120.0        ?
C10       N5        H5A       .         .         .              120.0        ?
C10       N5        H5B       .         .         .              120.0        ?
H5A       N5        H5B       .         .         .              120.0        ?
C28       C26       C27       .         .         .         121.80(14)        y
C28       C26       C25       .         .         .         129.74(15)        y
C27       C26       C25       .         .         .         108.45(13)        y
C17       N6        C18       .         .         .           114.0(2)        y
C28       C27       C26       2_666     .         .         121.11(14)        y
C28       C27       C1        2_666     .         .         128.13(15)        y
C26       C27       C1        .         .         .         110.73(13)        y
C18       N7        C19       .         .         .         115.20(18)        y
C27       C28       C26       2_666     .         .         117.08(15)        y
C27       C28       H28       2_666     .         .              121.5        ?
C26       C28       H28       .         .         .              121.5        ?
C17       N8        C19       .         .         .         113.72(19)        y
C18       N9        H9A       .         .         .              120.0        ?
C18       N9        H9B       .         .         .              120.0        ?
H9A       N9        H9B       .         .         .              120.0        ?
C19       N10       H10A      .         .         .              120.0        ?
C19       N10       H10B      .         .         .              120.0        ?
H10A      N10       H10B      .         .         .              120.0        ?

loop_                                         
_geom_hbond_atom_site_label_D
_geom_hbond_atom_site_label_H
_geom_hbond_atom_site_label_A
_geom_hbond_distance_DH
_geom_hbond_distance_HA
_geom_hbond_distance_DA
_geom_hbond_angle_DHA
_geom_hbond_site_symmetry_A
_geom_hbond_publ_flag
N4    H4B   N7          0.88        2.15    2.964(3)       154.3 2_556     y
N10   H10A  N1          0.88        2.22    3.077(3)       165.5 2_556     y


_diffrn_measured_fraction_theta_max    0.964 
_diffrn_reflns_theta_full              71.09 
_diffrn_measured_fraction_theta_full   0.964 
_refine_diff_density_max               0.354
_refine_diff_density_min              -0.356
_refine_diff_density_rms               0.067

#=== END OF THE CIF FILE
